## REFERENCES

1. Scheidegger D, Drop LJ: The relationship between duration of Q-T interval and plasma ionized calcium concentration: Experiments with acute, steady-state  $[Ca^{++}]$  changes in the dog. *ANESTHESIOLOGY* 51:143-148, 1979
2. Stulz PM, Scheidegger D, Drop LJ, et al: Ventricular

pump performance during hypocalcemia. *J Thorac Cardiovasc Surg* 78:185-194, 1979

3. Rumancik WM, Denlinger JK, Nahrwold ML, et al: The QT interval and serum ionized calcium. *JAMA* 240:366-368, 1978

(Accepted for publication December 11, 1979.)

Anesthesiology  
52:454, 1980

## Preoperative Stellate-ganglion Blockade to Prevent Hypertension Following Coronary-artery Operations

*To the Editor:*—The paper by Bidwai *et al.*<sup>1</sup> describing the prophylactic use of a right stellate ganglion block to prevent postmyocardial revascularization hypertension refers extensively to our work relating to that condition.<sup>2</sup> It's always gratifying to see one's observations confirmed and extended; however, we wish to underline a few points that could be forgotten in evaluating the initial success of a new method.

Perioperative hypertension can be due to many causes, as Bidwai *et al.*<sup>1</sup> would be the first to admit; all are not necessarily related to cardiovascular reflexes. Hypertension following cardiopulmonary bypass may be due to the lingering effects of increased serum catecholamines or changes in plasma renin activity.<sup>3</sup> Hypertension in the postoperative period can be due to pain, anxiety, hypoxia, hypercarbia, hypothermia, shivering, and possibly hypervolemia.<sup>4</sup> Therefore, therapy must be carefully designed for each individual case according to its merit. Further, careful evaluation of the risks of any procedure must be weighed against its possible advantages. The routine use of prophylactic stellate block to avoid some rise of arterial pressure that will otherwise occur in 30 per cent of patients should be carefully evaluated against possible other hemodynamic effects and complications of that procedure. In addition, one cannot always anticipate accurately the duration of cardiac surgical procedures, which

may unexpectedly outlast the duration of action of even a long-acting local anesthetic agent.

These remarks are not intended to belittle the importance of prophylaxis, but only to point out the many factors that must be examined before an overall recommendation can be accepted.

FAWZY G. ESTAFANOUS, M.D.

*Department of Cardio-Thoracic Anesthesia*

FETNAT M. FOUAD, M.D.

ROBERT C. TARAZI, M.D.

*Research Division*

*The Cleveland Clinic Foundation*

*9500 Euclid Avenue*

*Cleveland, Ohio 44106*

## REFERENCES

1. Bidwai AV, Rogers CR, Pearce M, et al: Preoperative stellate-ganglion blockade to prevent hypertension following coronary-artery operations. *ANESTHESIOLOGY* 51:345-347, 1979
2. Tarazi RC, Estafanous FG, Fouad FM: Unilateral stellate block in the treatment of hypertension after coronary bypass surgery. *Am J Cardiol* 42:1013-1018, 1978
3. Fouad FM, Estafanous FG, Bravo EL, et al: Possible role of cardioaortic reflexes in postcoronary bypass hypertension. *Am J Cardiol* 44:866-872, 1979
4. Estafanous FG, Tarazi RC, Viljoen JF, et al: Systemic hypertension following myocardial revascularization. *Am Heart J* 85:732-738, 1973

(Accepted for publication December 14, 1979.)

Anesthesiology  
52:454-455, 1980

## More on the Pharmacokinetics and Dynamics of Muscle Relaxants

*To the Editor:*—The suggestion by Stanski and co-workers<sup>1,2</sup> that recovery from nondepolarizing neuromuscular blockade can be totally explained in terms of competitive drug-receptor interactions leaves certain questions unanswered. These authors dispute the contention of Agoston, Feldman and Miller<sup>3</sup> that a

dissociation rate constant for the relaxant-receptor complex is the rate-limiting step in isolated-arm experiments. They argue that the temporal disequilibrium between plasma levels of relaxant and observed effects can be explained by physical factors such as muscle perfusion (washout rate), and that the

rate of decrease in plasma concentration of relaxant determines the rate of recovery from paralysis. They calculated that on the basis of drug-tissue solubility and regional blood flow the half time for equilibration between plasma concentration and pharmacologic effect for *d*Tc should be 4.6 min ( $t_{1/2}K_{eo} = 4.6$  min).

If drug-receptor interaction is instantaneous, as assumed by Stanski and Sheiner, then the recovery index (25 to 75 per cent recovery time) as determined by Feldman and Tyrrell<sup>4</sup> should be essentially identical for all relaxants. This is not the case. While the recovery indices in isolated-arm experiments for nondepolarizing relaxants are similar (gallamine  $9.8 \pm 1.3$  min, pancuronium  $10.4 \pm 1.4$  min, *d*-tubocurarine  $12.8 \pm 1.3$  min), the recovery index for decamethonium is significantly shorter ( $2.6 \pm 0.3$  min). A  $t_{1/2}K_{eo}$  of about 4 min is compatible with the rapid recovery of function seen in isolated-arm experiments with decamethonium. It does not, however, explain the delayed recovery observed using nondepolarizing relaxants in this experimental model.

Although the exact relationship between receptor occupancy by neuromuscular blocking drugs and twitch depression is not clearly defined, there is general agreement that at less than 70 per cent receptor occlusion ( $Y_B = 0.70$ ) no effect on single twitch tension is seen, and when  $Y_B$  exceeds 0.90, paralysis is essentially complete.<sup>5</sup> The values of  $Y_B$  for 25 and 75 per cent depression for single twitch tension lie somewhere in between.

Shanks *et al.*<sup>6</sup> state that during the offset of paralysis, when twitch depression is in the 20–80 per cent range, the rate of decline of paralysis is a function of the (log) plasma concentration. They found that recovery from 80 to 20 per cent twitch depression is associated with a decrease of less than 50 per cent in the plasma concentration of pancuronium. If this is so, then reasonable values of  $Y_B$  for 25 and 75 per cent recovery are 0.88 and 0.80, respectively.

Assuming an isolated-arm experiment (using *d*Tc as the test drug) is performed, and at the moment of tourniquet release paralysis is complete ( $Y_B = 0.92$ ), then table 1 should describe the events during recovery. Initially, the plasma concentration of *d*Tc (in units of  $K_B$ , the dissociation constant) should be 11.0 ( $uK_B$ ). If the  $t_{1/2}K_{eo}$  is 4.6 min, drug concentration is less than 8.0 ( $uK_B$ ) by 2 to 3 min after tourniquet release and 25 per cent recovery has occurred. Four minutes later, plasma *d*Tc concentrations are in the range of 4.0 ( $uK_B$ ) and 75 per cent recovery is present. By 10 min following tourniquet release full recovery to 30 Hz stimulation is complete. These are not the

TABLE 1. Predicted Changes in Receptor Drug Concentration and Receptor Occupancy in Isolated-arm Experiment When Plasma Level is Zero and  $t_{1/2}K_{eo}$  is 4.6 Min

| Time Since<br>Tourniquet<br>Release (min) | Drug Concentration<br>(in Units of $K_B$ ) | Receptor Occupancy<br>( $Y_B$ )* |
|-------------------------------------------|--------------------------------------------|----------------------------------|
| 0                                         | 11.0                                       | 0.92                             |
| 1                                         | 9.5                                        | 0.90                             |
| 2                                         | 8.1                                        | 0.89                             |
| 3                                         | 7.0                                        | 0.88                             |
| 4                                         | 6.0                                        | 0.86                             |
| 5                                         | 5.2                                        | 0.84                             |
| 6                                         | 4.5                                        | 0.82                             |
| 7                                         | 3.80                                       | 0.79                             |
| 8                                         | 3.3                                        | 0.77                             |
| 9                                         | 2.84                                       | 0.74                             |
| 10                                        | 2.44                                       | 0.71                             |
| 12                                        | 1.81                                       | 0.64                             |

\*  $Y_B = \frac{[B]}{1 + [B]}$ , where [B] is drug concentration in units of  $K_B$ .

results observed by Feldman and Tyrrell.<sup>4</sup> In fact, full recovery of neuromuscular function following *d*Tc often requires 30–45 min.

Physical washout may account for the rapid recovery from a depolarizing relaxant following tourniquet release, but then some other factor must be invoked to explain the significant difference in recovery times between decamethonium and pancuronium. The existence of a strong receptor dissociation constant for the latter drug still seems the most plausible explanation. Until these discrepancies between theory and observed results can be reconciled, the assumption that *d*Tc-receptor dissociation occurs instantaneously must be questioned.

AARON F. KOPMAN, M.D.  
Attending Anesthesiologist  
Long Island Jewish-Hillside Medical Center  
New Hyde Park, New York 11042

#### REFERENCES

1. Stanski DR, Sheiner LB: Pharmacokinetics and dynamics of muscle relaxants. *ANESTHESIOLOGY* 51:103–105, 1979
2. Stanski DR, Ham J, Miller RD, Sheiner LB: Pharmacokinetics and pharmacodynamics of *d*-tubocurarine during nitrous oxide-narcotic and halothane anesthesia in man. *ANESTHESIOLOGY* 51:235–241, 1979
3. Agoston S, Feldman SA, Miller RD: Plasma concentrations of pancuronium and neuromuscular blockade after injection into the isolated arm, bolus injection, and continuous infusion. *ANESTHESIOLOGY* 51:119–122, 1979
4. Feldman SA, Tyrrell MF: A new theory of the termination of action of muscle relaxants. *Proc R Soc Med* 63:692–695, 1970
5. Waud BE, Waud DR: *In* Muscle Relaxants. Edited by RI Katz. New York, Excerpta Medica, 1975, pp 28–42
6. Shanks CA, Somogyi AA, Triggs EJ: Dose response and plasma concentration-response relationships of pancuronium in man. *ANESTHESIOLOGY* 51:111–118, 1979

(Accepted for publication December 20, 1979.)
